# Supplementary material for: CoSPARP: Collaborative and Social-Personality Aware Recommendation of Programmes
Source: Hindawi journal article supplement (doi:10.1155/2022/7555753), 2022-09-27
Supplement: f1 [file 7555753.f1.pdf]

# ***CoSPARP*: COLLABORATIVE AND SOCIAL-PERSONALITY AWARE RECOMMENDATION OF PROGRAMMES**

Nana Yaw Asabere

Department of Computer Science, Faculty of Applied Sciences, Accra Technical University  
(ATU), Accra, Ghana.

**CORRESPONDING AUTHOR:** Nana Yaw Asabere is with the Department of Computer Science, Accra Technical University, P.O. Box GP 561, Accra-Ghana (e-mail: yawasabere2005@yahoo.com, yawasabere2011@gmail.com, phone numbers: +2333-266-685011 or +233-20-8531510).

## ***CoSPARP* Video Link**

<https://drive.google.com/file/d/1Fey-Dq5XCFXT11U3dARUkKxITbUCJEd3/view?usp=sharing>

## ***CoSPARP* Experimental Dataset**

[https://docs.google.com/spreadsheets/d/1NBVeCjfpZ\\_JvThlGIhHgGM4To0uHbQM/edit?usp=sharing&ouid=108807310463757292140&rtpof=true&sd=true](https://docs.google.com/spreadsheets/d/1NBVeCjfpZ_JvThlGIhHgGM4To0uHbQM/edit?usp=sharing&ouid=108807310463757292140&rtpof=true&sd=true)
